# Supplementary material
Source: PubMed Central journal article supplement (PMC3502977)
Supplement: JCM.01516-12_zjm999092079so1.pdf [file JCM.01516-12_zjm999092079so1.pdf]

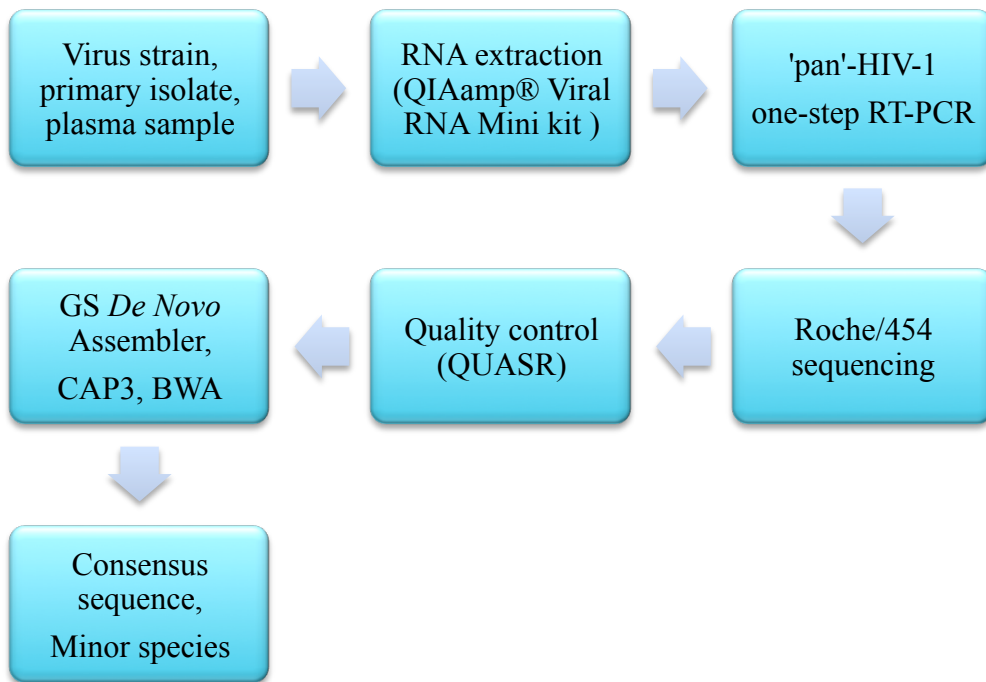

**FIG S1** Flowchart of the universal method for generation of HIV-1 genome sequences. QUASR is freely available at <http://sourceforge.net/projects/quasr/>.
