# Supplementary material
Source: PubMed Central journal article supplement (PMC3502977)
Supplement: JCM.01516-12_zjm999092079so2.pdf [file JCM.01516-12_zjm999092079so2.pdf]

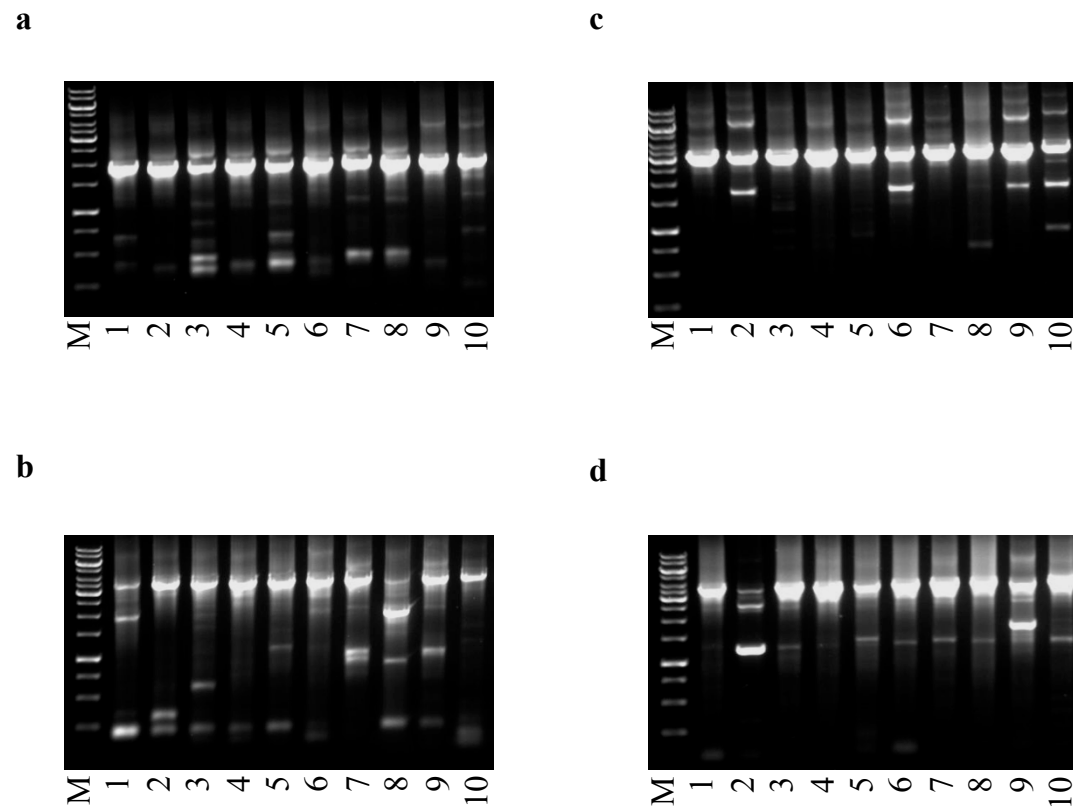

| No. | Subtype/<br>Group | Strain  |
|-----|-------------------|---------|
| 1   | A                 | 92UG037 |
| 2   | B                 | 92TH014 |
| 3   | C                 | 98TZ017 |
| 4   | D                 | 94UG114 |
| 5   | AE                | 92TH001 |
| 6   | F                 | 93BR020 |
| 7   | G                 | RU570   |
| 8   | AG-GH             | VI525   |
| 9   | N                 | YBF30   |
| 10  | O                 | MVP5180 |

**FIG S2** Broad application of the ‘pan’-HIV-1 RT-PCR. The primer set amplifies HIV-1 genomes in four overlapping products. RNA of the WHO HIV-1 genotype reference panel was reverse transcribed and amplified, and 5 ul pcr product were analysed by 1% agarose gel electrophoresis.

- a** Gel electrophoresis of 1.9kb products amplified by primer set 1.
- b** Gel electrophoresis of 3.6kb products amplified by primer set 2.
- c** Gel electrophoresis of 3.0 kb products amplified by primer set 3.
- d** Gel electrophoresis of 3.5kb products amplified by primer set 4.
