# Supplementary material
Source: PubMed Central journal article supplement (PMC3502977)
Supplement: JCM.01516-12_zjm999092079so3.pdf [file JCM.01516-12_zjm999092079so3.pdf]

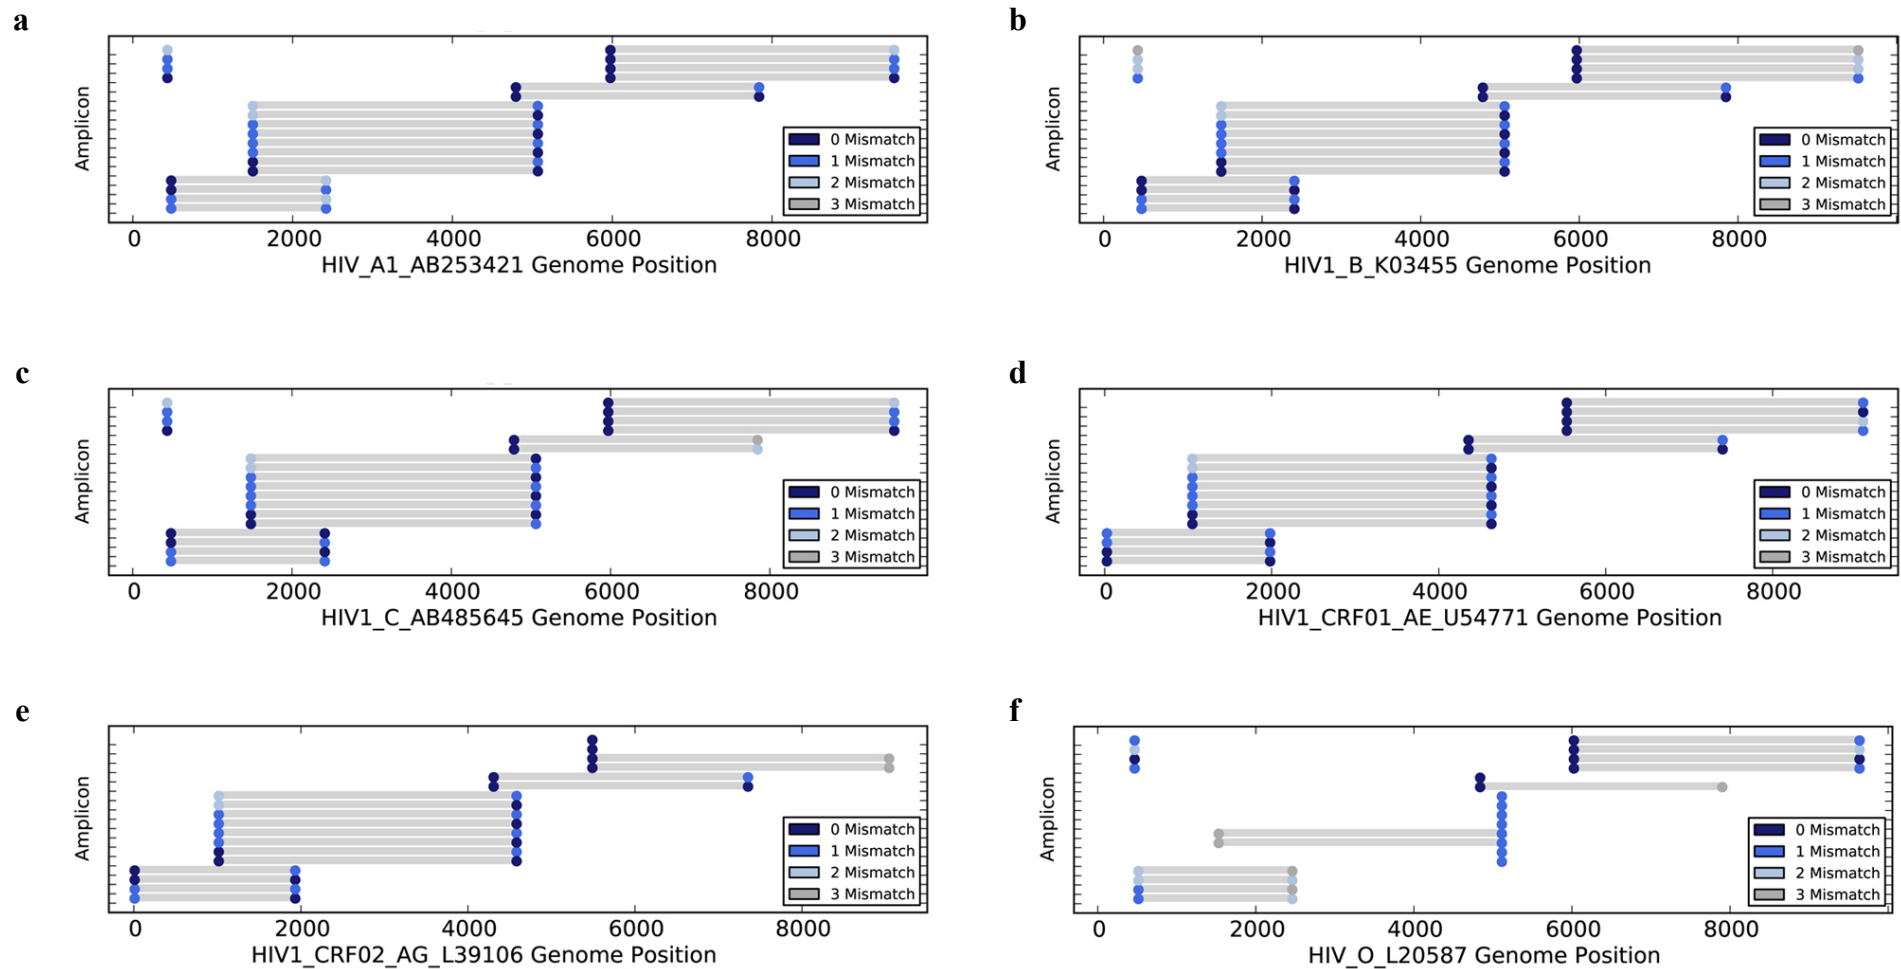

**FIG S3** Broad application of the ‘pan’-HIV-1 RT-PCR. The primer set amplifies HIV-1 genomes in four overlapping products of 1.9kb, 3.6kb, 3.0kb and 3.5kb. Results of an *in silico* PCR testing the primer set against representative HIV-1 genome sequences of subtypes most important for the HIV-1 epidemiology are shown. Grey bars represent the amplicons and circles stand for the primers. The number of mismatches between a primer and the respective sequence is indicated by the colour of the circle. As primers contain ambiguous bases and all possible combinations are shown separately, more than one amplicon and primer set per product are displayed.

**a** *In silico* PCR against subtype A1 strain (accession number AB253421).

**b** *In silico* PCR against subtype B strain (accession number K03455).

**c** *In silico* PCR against subtype C strain (accession number AB485645).

**d** *In silico* PCR against CRF01\_AE strain (accession number U54771).

**e** *In silico* PCR against CRF02\_AG strain (accession number L39106).

**f** *In silico* PCR against group O strain (accession number L20587).
