# Supplementary material
Source: PubMed Central journal article supplement (PMC3502977)
Supplement: JCM.01516-12_zjm999092079so4.pdf [file JCM.01516-12_zjm999092079so4.pdf]

**FIG S4** Detection of recombination in HIV-1 genomes sequenced in this study. Two CRFs, CRF01\_AE (left) and CRF14\_BG (right) were sequenced and analysed with **(a-c)** the Rega HIV-1 Subtyping Tool version 2.0 and **(d)** the Recombinant Identification Program version 3.0.

**a** Genome view of the CRFs. Regions with bootstrap confidence of  $> 70\%$  are coloured according to the subtype, with the same colour scheme as in **b** and **c**.

**b & c** Bootscan analysis along the genome. A sliding window of 400 nucleotides was used. For each window, the bootstrap support for the different subtypes and the appropriate CRF is plotted.

**d** Similarity to different subtypes and CRF01\_AE of the HIV-1 subtype consensus alignment. A sliding window of 400 nucleotides was used.
