# Supplementary material
Source: PubMed Central journal article supplement (PMC3502977)
Supplement: JCM.01516-12_zjm999092079so5.pdf [file JCM.01516-12_zjm999092079so5.pdf]

**a**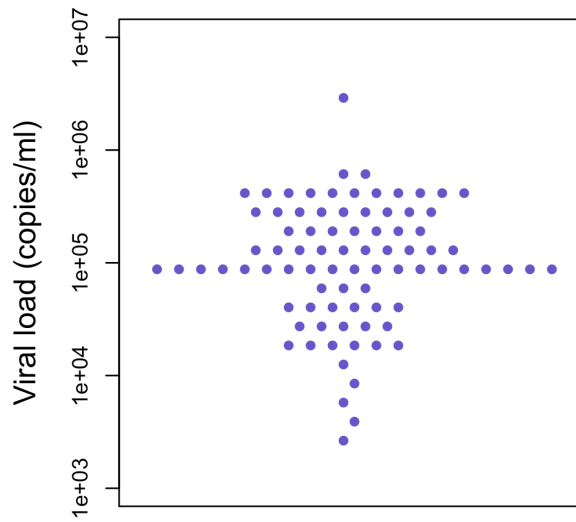

4/4 amplicons successfully amplified

**b**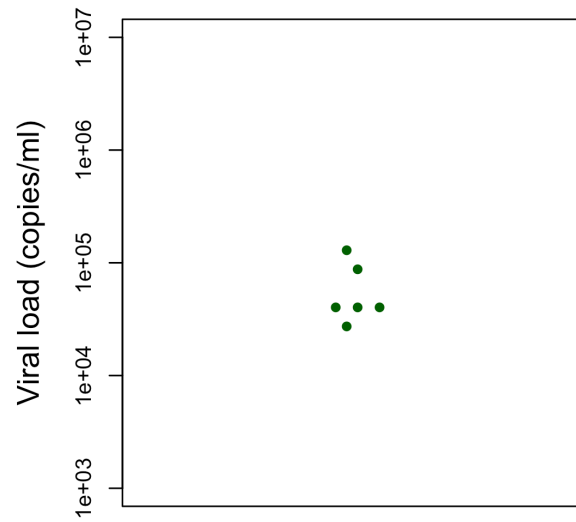

3/4 amplicons successfully amplified

**FIG S5** Sensitivity of the ‘pan’-HIV-1 RT-PCR. The primer set amplifies HIV-1 genomes in four overlapping products. A total of 90 uncultured plasma virus samples were tested.

**a** Viral loads of samples with successful amplification of 4/4 amplicons.

**b** Viral loads of samples with successful amplification of 3/4 amplicons.
