# Supplementary material
Source: PubMed Central journal article supplement (PMC3502977)
Supplement: JCM.01516-12_zjm999092079so7.pdf [file JCM.01516-12_zjm999092079so7.pdf]

**TABLE S1** Samples, RT-PCR and next-generation sequencing results

| Sample                   | Strain <sup>a</sup> | Group/<br>Subtype/<br>CRF <sup>a</sup> | Viral load<br>(copies/ml) <sup>a</sup> | Origin <sup>c</sup> | RT-PCR result |       |       |       | Accession number                       |                               |           | Nucleotide identity<br>of GenBank<br>sequence and<br>sequence obtained<br>by NGS (%) <sup>a</sup> |
|--------------------------|---------------------|----------------------------------------|----------------------------------------|---------------------|---------------|-------|-------|-------|----------------------------------------|-------------------------------|-----------|---------------------------------------------------------------------------------------------------|
|                          |                     |                                        |                                        |                     | Set 1         | Set 2 | Set 3 | Set 4 | GenBank/<br>EMBL/<br>DDBJ <sup>a</sup> | ENA (this study) <sup>d</sup> |           |                                                                                                   |
|                          |                     |                                        |                                        |                     |               |       |       |       |                                        | Run 1                         | Run 2     |                                                                                                   |
| Virus strains - HIV-1    |                     |                                        |                                        |                     |               |       |       |       |                                        |                               |           |                                                                                                   |
| Strain #1                | 92UG037             | A                                      | nd                                     | UCL                 | +++           | +     | +++   | +     | U51190                                 | ERS100441                     | ERS163954 | 99.4                                                                                              |
| Strain #2                | 98TZ017             | C                                      | nd                                     | NIBSC               | +++           | +++   | +++   | +++   | AF286235                               | ERS100442                     | ERS163955 | 99.3                                                                                              |
| Strain #3                | 94UG114             | D                                      | nd                                     | NIBSC               | +++           | +++   | +++   | +++   | U88824                                 | ERS100443                     | ERS164035 | 99.3                                                                                              |
| Strain #4                | 93BR020             | F                                      | nd                                     | UCL                 | +++           | ++    | +++   | +++   | AF005494                               | ERS100444                     | ERS163957 | 99.0                                                                                              |
| Strain #5                | YBF30               | N                                      | nd                                     | NIBSC               | +++           | +++   | +++   | +++   | AJ006022                               | ERS100445                     | ERS163958 | 99.1                                                                                              |
| Strain #6                | MVP5180             | O                                      | nd                                     | NIBSC               | +++           | ++    | +++   | +++   | L20571                                 | ERS100446                     | ERS164036 | 98.8                                                                                              |
| Strain #7                | nd                  | O                                      | nd                                     | UCL                 | +++           | ++    | +++   | +++   | nd                                     | ERS100447                     | ERS163960 | nd                                                                                                |
| Strain #8                | nd                  | CRF01_AE                               | nd                                     | UCL                 | ++            | +     | ++    | +     | nd                                     | ERS100448                     | ERS163961 | nd                                                                                                |
| Strain #9                | X1870               | CRF14_BG                               | nd                                     | NIBSC               | +++           | ++    | ++    | +     | nd                                     | ERS100449                     | ERS163962 | nd                                                                                                |
| Primary isolates - HIV-1 |                     |                                        |                                        |                     |               |       |       |       |                                        |                               |           |                                                                                                   |
| Primary isolate #1       | nd                  | C                                      | nd                                     | UCL                 | +++           | ++    | +++   | +++   | nd                                     | ERS100450                     | ERS163963 | nd                                                                                                |
| Primary isolate #2       | nd                  | D                                      | nd                                     | UCL                 | +++           | +     | +++   | +++   | nd                                     | ERS100451                     | ERS163964 | nd                                                                                                |
| Plasma samples           |                     |                                        |                                        |                     |               |       |       |       |                                        |                               |           |                                                                                                   |
| Plasma #1 - HIV-1        | nd                  | B                                      | 3,000                                  | UCLH                | +++           | +     | +     | +     | nd                                     | ERS100452                     | ERS163965 | nd                                                                                                |
| Plasma #2 - HIV-1        | nd                  | C                                      | 30,000                                 | UCLH                | +++           | +     | +     | +     | nd                                     | ERS100453                     | ERS163966 | nd                                                                                                |
| Plasma #3 - HIV-1        | nd                  | B                                      | 100,000                                | UCLH                | +++           | +     | +     | +     | nd                                     | ERS100454                     | ERS163967 | nd                                                                                                |
| Plasma #4 - HIV-1        | nd                  | A                                      | 300,000                                | UCLH                | +++           | +     | +     | +     | nd                                     | ERS100455                     | ERS163968 | nd                                                                                                |
| Plasma #5 - HIV-2        | nd                  | nd                                     | 180,000                                | UCLH                | -             | -     | -     | -     | nd                                     | nd                            | nd        | nd                                                                                                |
| Plasma #6 - HIV-2        | nd                  | nd                                     | 1,077                                  | UCLH                | -             | -     | -     | -     | nd                                     | nd                            | nd        | nd                                                                                                |
| Plasma #7 - HIV-2        | nd                  | nd                                     | 454                                    | UCLH                | -             | -     | -     | -     | nd                                     | nd                            | nd        | nd                                                                                                |
| Plasma #8 - HIV-2        | nd                  | nd                                     | 112                                    | UCLH                | -             | -     | -     | -     | nd                                     | nd                            | nd        | nd                                                                                                |
| Plasma #9 - CMV          | nd                  | nd                                     | 340                                    | UCLH                | -             | -     | -     | -     | nd                                     | nd                            | nd        | nd                                                                                                |
| Plasma #10 - CMV         | nd                  | nd                                     | 440                                    | UCLH                | -             | -     | -     | -     | nd                                     | nd                            | nd        | nd                                                                                                |
| Plasma #11 - CMV         | nd                  | nd                                     | 450                                    | UCLH                | -             | -     | -     | -     | nd                                     | nd                            | nd        | nd                                                                                                |
| Plasma #12 - CMV         | nd                  | nd                                     | 390                                    | UCLH                | -             | -     | -     | -     | nd                                     | nd                            | nd        | nd                                                                                                |
| Plasma #13 - HCV         | nd                  | nd                                     | 0 <sup>b</sup>                         | UCLH                | -             | -     | -     | -     | nd                                     | nd                            | nd        | nd                                                                                                |
| Plasma #14 - HCV         | nd                  | nd                                     | 46 <sup>b</sup>                        | UCLH                | -             | -     | -     | -     | nd                                     | nd                            | nd        | nd                                                                                                |
| Plasma #15- HCV          | nd                  | nd                                     | 5,142,560                              | UCLH                | -             | -     | -     | -     | nd                                     | nd                            | nd        | nd                                                                                                |
| Plasma #16 - HCV         | nd                  | nd                                     | 10,582,400                             | UCLH                | -             | -     | -     | -     | nd                                     | nd                            | nd        | nd                                                                                                |

|                       |    |    |   |      |   |   |   |   |    |    |    |    |
|-----------------------|----|----|---|------|---|---|---|---|----|----|----|----|
| Plasma #17 - negative | nd | nd | 0 | UCLH | - | - | - | - | nd | nd | nd | nd |
| Plasma #18 - negative | nd | nd | 0 | UCLH | - | - | - | - | nd | nd | nd | nd |
| Plasma #19 - negative | nd | nd | 0 | UCLH | - | - | - | - | nd | nd | nd | nd |
| Plasma #20 - negative | nd | nd | 0 | UCLH | - | - | - | - | nd | nd | nd | nd |

<sup>a</sup> nd, not determined.

<sup>b</sup> IU/ml.

<sup>c</sup> NIBSC, National Institute for Biological Standards and Control at the Health Protection Agency. UCL, University College London.

UCLH, University College London Hospitals NHS Foundation Trust.

<sup>d</sup> ENA accession numbers for two independent sequencing runs are shown.
