# Supplementary material
Source: PubMed Central journal article supplement (PMC3502977)
Supplement: JCM.01516-12_zjm999092079so8.pdf [file JCM.01516-12_zjm999092079so8.pdf]

**TABLE S2** Frequency of *in vitro* recombination

| Sample <sup>a</sup> | NGS result (subtype/recombinant) | Accession number (ENA) |
|---------------------|----------------------------------|------------------------|
| Per product #1      | B                                | ERS163969              |
| Per product #2      | B                                | ERS163970              |
| Per product #3      | B                                | ERS163971              |
| Per product #4      | C                                | ERS163972              |
| Per product #5      | B                                | ERS163973              |
| Per product #6      | B                                | ERS163974              |
| Per product #7      | B                                | ERS163975              |
| Per product #8      | C                                | ERS163976              |
| Per product #9      | B                                | ERS163977              |
| Per product #10     | B                                | ERS163978              |
| Per product #11     | B                                | ERS163979              |
| Per product #12     | B                                | ERS163980              |
| Per product #13     | C                                | ERS163981              |
| Per product #14     | B                                | ERS163982              |
| Per product #15     | C                                | ERS163983              |
| Per product #16     | B                                | ERS163984              |
| Per product #17     | B                                | ERS163983              |
| Per product #18     | B                                | ERS163984              |
| Per product #19     | B                                | ERS163987              |
| Per product #20     | C                                | ERS163988              |
| Per product #21     | B                                | ERS163989              |
| Per product #22     | B                                | ERS163990              |
| Per product #23     | B                                | ERS163991              |
| Per product #24     | B                                | ERS163992              |
| Per product #25     | B                                | ERS163993              |
| Per product #26     | B                                | ERS163994              |
| Per product #27     | C                                | ERS163995              |
| Per product #28     | B                                | ERS163996              |
| Per product #29     | B                                | ERS163997              |
| Per product #30     | B                                | ERS163998              |
| Per product #31     | B                                | ERS163999              |
| Per product #32     | B                                | ERS164000              |
| Per product #33     | C                                | ERS164001              |
| Per product #34     | B                                | ERS164002              |
| Per product #35     | B                                | ERS164003              |
| Per product #36     | C                                | ERS164004              |
| Per product #37     | C                                | ERS164005              |
| Per product #38     | B                                | ERS164006              |
| Per product #39     | B                                | ERS164007              |
| Per product #40     | B                                | ERS164008              |
| Per product #41     | C                                | ERS164009              |
| Per product #42     | C                                | ERS164010              |
| Per product #43     | B                                | ERS164011              |
| Per product #44     | C                                | ERS164012              |
| Per product #45     | C                                | ERS164013              |
| Per product #46     | B                                | ERS164014              |
| Per product #47     | C                                | ERS164015              |
| Per product #48     | B                                | ERS164016              |
| Per product #49     | B                                | ERS164017              |
| Per product #50     | B                                | ERS164018              |
| Per product #51     | B                                | ERS164019              |
| Per product #52     | B                                | ERS164020              |

|                          |             |           |
|--------------------------|-------------|-----------|
| Per product #53          | B           | ERS164021 |
| Per product #54          | B           | ERS164022 |
| Per product #55          | B           | ERS164023 |
| Per product #56          | B           | ERS164024 |
| Per product #57          | B           | ERS164025 |
| Per product #58          | B           | ERS164026 |
| Per product #59          | B           | ERS164027 |
| Per product #60          | B:C         | ERS164028 |
| Per product #61          | C           | ERS164029 |
| Per product #62          | B           | ERS164030 |
| Per product #63          | B           | ERS164031 |
| Per product #64          | C           | ERS164032 |
| Amplicon HIV-1 subtype B | B (control) | ERS164033 |
| Amplicon HIV-1 subtype C | C (control) | ERS164034 |

---

<sup>a</sup> Primer set 1 was used.
